# Supplementary material for: Development and results of a patient-reported treatment experience questionnaire on a 1.5 T MR-Linac
Source: PubMed Central journal article supplement — Clin Transl Radiat Oncol. 2021 Jun 29;30:31–7. doi: 10.1016/j.ctro.2021.06.003 (PMC8283148; doi:10.1016/j.ctro.2021.06.003), 2021-06-29
Supplement: mmc1.pdf [file mmc1.pdf]

**Study Name:** \_\_\_\_\_ **Study Number:** \_\_\_\_\_ **Date:** \_\_\_\_\_

**Patient Experience Questionnaire; MRLinac (Unity) Radiotherapy treatment**

Radiotherapy treatment delivered on the MR Linac (Unity) using Magnetic Resonance Imaging (MRI) is a new technology. We would like to find out your views about having treatment on Unity. This may help us improve the experience for you and other patients.

We would be grateful if you would complete this questionnaire after your treatment and return it to us before you leave. Please circle the response that best fits your experience

|                                                                      | <b>0<br/>Not at all</b> | <b>1<br/>Slightly</b> | <b>2<br/>Moderately</b> | <b>3<br/>Very</b> |
|----------------------------------------------------------------------|-------------------------|-----------------------|-------------------------|-------------------|
| I needed more detailed information before my treatment               | Not at all              | Slightly              | Moderately              | Very              |
| I found the treatment position comfortable                           | Not at all              | Slightly              | Moderately              | Very              |
| I found the treatment bed comfortable                                | Not at all              | Slightly              | Moderately              | Very              |
| I found it easy it to stay still and maintain the treatment position | Not at all              | Slightly              | Moderately              | Very              |
| I wanted to come out of the machine during my treatment              | Not at all              | Slightly              | Moderately              | Very              |
| I felt calm during my treatment                                      | Not at all              | Slightly              | Moderately              | Very              |
| I found the noise in the room easy to tolerate                       | Not at all              | Slightly              | Moderately              | Very              |
| I found the lighting in the room easy to tolerate                    | Not at all              | Slightly              | Moderately              | Very              |
| I found the time taken for the treatment easy to tolerate            | Not at all              | Slightly              | Moderately              | Very              |
| I felt dizzy during my treatment                                     | Not at all              | Slightly              | Moderately              | Very              |
| I felt dizzy immediately after my treatment                          | Not at all              | Slightly              | Moderately              | Very              |
| I felt hot during my treatment                                       | Not at all              | Slightly              | Moderately              | Very              |
| I felt tingling sensations during my treatment                       | Not at all              | Slightly              | Moderately              | Very              |
| I experienced a metallic taste during my treatment                   | Not at all              | Slightly              | Moderately              | Very              |
| I needed more communication from staff during my treatment           | Not at all              | Slightly              | Moderately              | Very              |
| I forced myself to manage the situation                              | Not at all              | Slightly              | Moderately              | Very              |
| I found listening to the music helpful whilst having my treatment    | Not at all              | Slightly              | Moderately              | Very              |
| I understood the procedure                                           | Not at all              | Slightly              | Moderately              | Very              |

**Comments:**
